# Supplementary material for: Triglyceride-glucose index as a prognostic marker after ischemic stroke or transient ischemic attack: a prospective observational study
Source: PubMed Central journal article supplement (PMC9714168; doi:10.1186/s12933-022-01695-2), 2022-11-30
Supplement: 12933_2022_1695_MOESM1_ESM.pdf [file 12933_2022_1695_MOESM1_ESM.pdf]

**Supplementary Table 1. Examination and investigation findings**

|                              | Total<br>(n=866) | TyG index            |                      |                      | <i>P</i> value<br>for trend |
|------------------------------|------------------|----------------------|----------------------|----------------------|-----------------------------|
|                              |                  | Tertile 1<br>(n=288) | Tertile 2<br>(n=299) | Tertile 3<br>(n=299) |                             |
| Blood pressure               |                  |                      |                      |                      |                             |
| Systolic, mm Hg, mean (SD)   | 152 (27)         | 149 (27)             | 151 (28)             | 155 (27)             | 0.040                       |
| Diastolic, mm Hg, mean (SD)  | 86 (17)          | 85 (18)              | 86 (16)              | 87 (18)              | 0.17                        |
| Laboratory data              |                  |                      |                      |                      |                             |
| LDL-C, mg/dL, mean (SD)      | 116 (38)         | 108 (32)             | 114 (40)             | 125 (39)             | <0.001                      |
| HDL-C, mg/dL, mean (SD)      | 56 (18)          | 64 (18)              | 56 (17)              | 48 (14)              | <0.001                      |
| TG, mg/dL, median (IQR)      | 109 (77–149)     | 70 (56–83)           | 113 (92–129)         | 169 (137–227)        | <0.001                      |
| Glucose, mg/dL, median (IQR) | 113 (99–139)     | 101 (91–112)         | 112 (99–130)         | 142 (116–192)        | <0.001                      |
| HbA1c, %, median (IQR)       | 6.0 (5.6–6.9)    | 5.8 (5.5–6.1)        | 6 (5.6–6.6)          | 6.9 (6.0–8.1)        | <0.001                      |
| Initial NIHSS, median (IQR)  | 3 (1–5)          | 2 (1–4)              | 3 (1–6)              | 3 (1–5)              | 0.14                        |
| ASCOD grade, n(%)            |                  |                      |                      |                      |                             |
| Atherothrombosis             |                  |                      |                      |                      |                             |
| A1 or A2                     | 328 (37.9)       | 89 (30.9)            | 105 (36.3)           | 134 (46.4)           | <0.001                      |
| A3                           | 200 (23.1)       | 67 (23.3)            | 38 (23.5)            | 65 (22.5)            | 0.83                        |
| A0                           | 334 (38.6)       | 129 (44.8)           | 115 (39.8)           | 90 (31.1)            | <0.001                      |
| Small vessel disease         |                  |                      |                      |                      |                             |
| S1 or S2                     | 191 (22.1)       | 57 (19.8)            | 58 (20.1)            | 76 (26.3)            | 0.030                       |
| S3                           | 251 (29.0)       | 81 (28.1)            | 82 (28.4)            | 88 (30.5)            | 0.54                        |
| S0                           | 424 (49.0)       | 150 (52.1)           | 149 (51.6)           | 125 (43.3)           | 0.034                       |
| Cardiac pathology            |                  |                      |                      |                      |                             |
| C1 or C2                     | 299 (34.5)       | 120 (41.7)           | 109 (37.7)           | 70 (24.2)            | <0.001                      |
| C3                           | 126 (14.6)       | 34 (11.8)            | 31 (10.7)            | 61 (21.1)            | <0.001                      |
| C0                           | 441 (50.9)       | 134 (46.5)           | 149 (51.6)           | 158 (54.7)           | 0.050                       |

Patients were divided into three groups according to the tertile of TyG index: tertile 1, <8.48; tertile 2, 8.48–9.01; and tertile 3, >9.01.

ASCOD indicates atherosclerosis, small vessel disease, cardiac pathology, other definite cause; HDL-C, high-density lipoprotein cholesterol; IQR, interquartile range; LDL-C, low-density lipoprotein cholesterol; NIHSS, National Institute of Health Stroke Scale; SD, standard deviation; TG, triglycerides; TyG, triglyceride-glucose.
