# Supplementary material for: Triglyceride-glucose index as a prognostic marker after ischemic stroke or transient ischemic attack: a prospective observational study
Source: PubMed Central journal article supplement (PMC9714168; doi:10.1186/s12933-022-01695-2), 2022-11-30
Supplement: 12933_2022_1695_MOESM2_ESM.pdf [file 12933_2022_1695_MOESM2_ESM.pdf]

## Supplementary Figure 1. Prevalence of atherosclerotic diseases

**A. Symptomatic intracranial stenosis >50%**

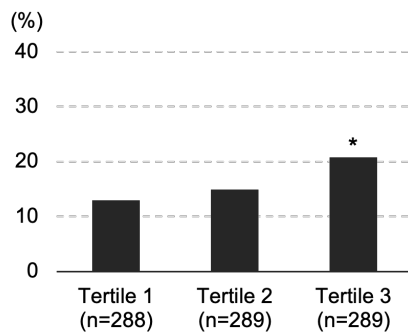

**B. Asymptomatic intracranial stenosis >50%**

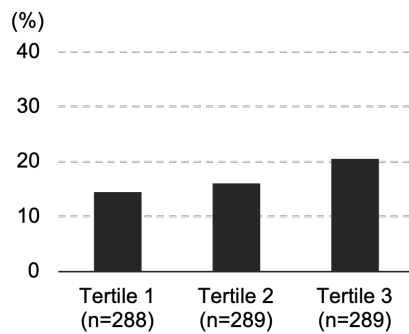

**C. Intracranial stenosis >50% in the anterior circulation**

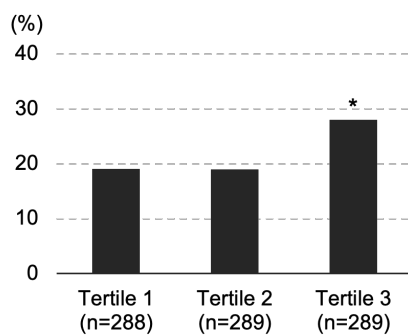

**D. Intracranial stenosis >50% in the posterior circulation**

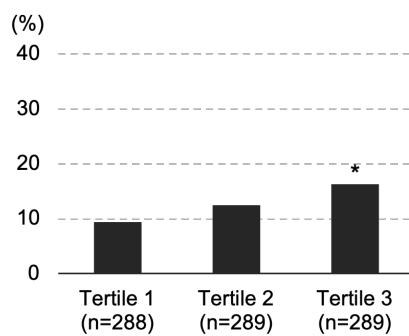

**E. Symptomatic extracranial carotid stenosis >50%**

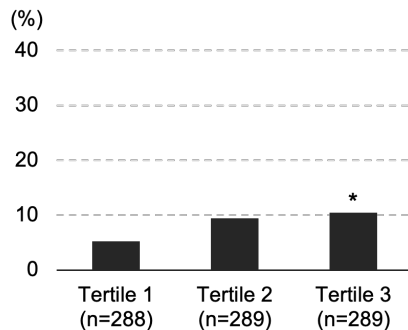

**F. Symptomatic extracranial carotid stenosis 30–50%**

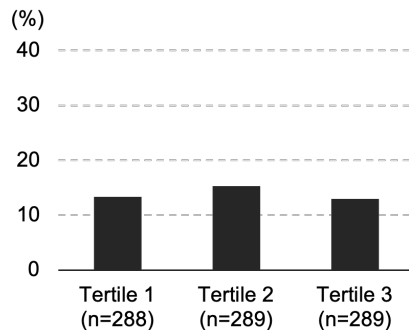

**G. Asymptomatic extracranial carotid stenosis >50%**

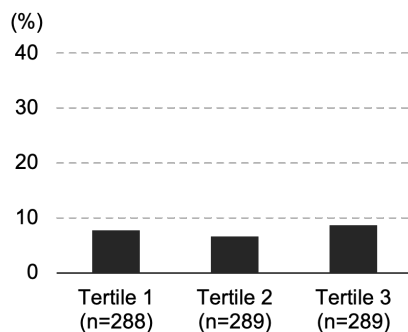

\*  $P < 0.05$

Patients were divided into three groups according to the tertile of TyG index: tertile 1,  $< 8.48$ ; tertile 2,  $8.48-9.01$ ; and tertile 3,  $> 9.01$ .
