# Supplementary material for: Triglyceride-glucose index as a prognostic marker after ischemic stroke or transient ischemic attack: a prospective observational study
Source: Springer Nature journal article supplement (doi:10.1186/s12933-022-01695-2), 2022-11-30
Supplement: MOESM3 [file 23772978]

**Supplementary Table 2. Medication use at discharge**

|                                  | Total<br>(n=866) | TyG index            |                      |                      | P value<br>for trend |
|----------------------------------|------------------|----------------------|----------------------|----------------------|----------------------|
|                                  |                  | Tertile 1<br>(n=288) | Tertile 2<br>(n=299) | Tertile 3<br>(n=299) |                      |
| Any antiplatelet agents          | 592 (70.4)       | 173 (62.7)           | 197 (68.9)           | 222 (79.6)           | <0.001               |
| Dual antiplatelet therapy        | 231 (28.7)       | 59 (22.3)            | 74 (27.3)            | 98 (36.6)            | 0.001                |
| Any anticoagulant agents         | 291 (34.6)       | 112 (40.6)           | 109 (38.3)           | 70 (25.1)            | <0.001               |
| Direct oral anticoagulant        | 160 (18.5)       | 56 (19.4)            | 60 (20.8)            | 44 (15.2)            | 0.19                 |
| Warfarin                         | 119 (13.7)       | 56 (19.4)            | 42 (14.5)            | 21 (7.3)             | <0.001               |
| Any antihypertensive agents      | 482 (56.3)       | 156 (55.1)           | 156 (54.7)           | 170 (59.2)           | 0.48                 |
| Calcium channel blocker          | 276 (31.9)       | 87 (30.2)            | 91 (31.5)            | 98 (33.9)            | 0.63                 |
| Angiotensin receptor II blocker  | 250 (29.2)       | 77 (27.0)            | 81 (28.2)            | 92 (32.3)            | 0.35                 |
| Any lipid-lowering agents        | 529 (62.3)       | 146 (52.5)           | 166 (58.0)           | 217 (76.1)           | <0.001               |
| Statin                           | 485 (56.0)       | 137 (47.6)           | 162 (56.1)           | 186 (64.4)           | <0.001               |
| Any antidiabetic agents          | 241 (28.6)       | 33 (12.0)            | 60 (21.1)            | 148 (52.1)           | <0.001               |
| Insulin                          | 109 (12.6)       | 16 (5.6)             | 29 (10.0)            | 64 (22.2)            | <0.001               |
| Dipeptidyl peptidase-4 inhibitor | 144 (16.6)       | 17 (5.9)             | 34 (11.8)            | 93 (32.2)            | <0.001               |
| Biguanide                        | 56 (6.5)         | 4 (1.4)              | 14 (4.8)             | 38 (13.2)            | <0.001               |
| Sulfonylurea                     | 50 (5.8)         | 8 (2.8)              | 7 (2.4)              | 35 (12.1)            | <0.001               |
| Alpha-glucosidase inhibitor      | 37 (4.3)         | 3 (1.0)              | 12 (4.2)             | 22 (7.6)             | <0.001               |
| Thiazolidinedione                | 6 (0.7)          | 1 (0.4)              | 0                    | 5 (1.7)              | 0.020                |

Shown are n (%).

Patients were divided into three groups according to the tertile of TyG index: tertile 1, <8.48; tertile 2, 8.48–9.01; and tertile 3, >9.01.
